# Supplementary material for: Effect of Xenon Treatment on Gene Expression in Brain Tissue after Traumatic Brain Injury in Rats
Source: MDPI journal article supplement (doi:10.3390/brainsci11070889), 2021-07-03
Supplement: s1 [file s1]

# Supplementary materials

**Table S1.** The panel of genes for multiplex gene expression analysis

| Inflammation  |                         |                      | Apoptosis       | DNA repair   | Neurogenesis and neuroplasticity | Oxidation and antioxidation | mTOR signalling | Autophagy and mitophagy | Others           | HKGs         |
|---------------|-------------------------|----------------------|-----------------|--------------|----------------------------------|-----------------------------|-----------------|-------------------------|------------------|--------------|
| <i>S100b</i>  | <i>Caspase-1</i>        | <i>Nfkb1</i>         | <i>Bax</i>      | <i>Ogg1</i>  | <i>TrkB</i>                      | <i>Sod1</i>                 | <i>Prkaa2</i>   | <i>Pink1</i>            | <i>Kcnk2</i>     | <i>Ppia</i>  |
| <i>S100A8</i> | <i>Caspase-11</i>       | <i>Nfkb2</i>         | <i>Bcl2</i>     | <i>Parp1</i> | <i>Mapk1</i>                     | <i>Nrf2</i>                 | <i>Akt1</i>     | <i>Atg5</i>             | <i>Nmdar</i>     | <i>Hmbs</i>  |
| <i>S100A9</i> | <i>Tlr2</i>             | <i>Myd88</i>         | <i>Survivin</i> | <i>H2AX</i>  | <i>Igf-1</i>                     | <i>Hmox1</i>                | <i>Mtor</i>     | <i>Csnk2a2</i>          | <i>Daxx</i>      | <i>B2m</i>   |
| <i>Il1b</i>   | <i>Tlr4</i>             | <i>Cmpk2</i>         | <i>Tgfb</i>     | <i>Brca1</i> | <i>Ngfr</i>                      | <i>Nqo1</i>                 | <i>Akt1s1</i>   | <i>Mfn1</i>             | <i>Aqp4</i>      | <i>Gapdh</i> |
| <i>Il6</i>    | <i>Tlr9</i>             | <i>Nlrp3</i>         | <i>Smad4</i>    |              | <i>Plcg1</i>                     | <i>Nox4</i>                 | <i>Akt2</i>     | <i>Sqstm1</i>           | <i>Aqp5</i>      | <i>Ywhaz</i> |
| <i>Il10</i>   | <i>Irf1</i>             | <i>Aim2</i>          | <i>Bad</i>      |              | <i>Creb</i>                      | <i>Nox2</i>                 |                 | <i>Src</i>              | <i>Clic4</i>     |              |
| <i>Il18</i>   | <i>Irf3</i>             | <i>Nod1</i>          |                 |              | <i>Bdnf</i>                      | <i>Hif1a</i>                |                 | <i>Ulk1</i>             | <i>Gsk3b</i>     |              |
| <i>CD14</i>   | <i>Tnfa</i>             | <i>Nod2</i>          |                 |              | <i>Pi3k</i>                      | <i>Keap1</i>                |                 | <i>Beclin-1</i>         | <i>b-Catenin</i> |              |
| <i>CD36</i>   | <i>Tmem173 (Sting1)</i> | <i>Mb21d1 (cGAS)</i> |                 |              | <i>Jnk</i>                       | <i>Gclc</i>                 |                 | <i>Map1lc3a</i>         |                  |              |
| <i>Olr1</i>   | <i>Hmgb1</i>            | <i>Cxcl1</i>         |                 |              | <i>Vegf</i>                      | <i>Park7</i>                |                 | <i>Mfn2</i>             |                  |              |
| <i>Wnt3a</i>  | <i>Gsdmd</i>            | <i>Icam1</i>         |                 |              | <i>Ncam1</i>                     |                             |                 |                         |                  |              |
| <i>Wnt5a</i>  |                         |                      |                 |              | <i>Gdnf</i>                      |                             |                 |                         |                  |              |
|               |                         |                      |                 |              | <i>TrkA</i>                      |                             |                 |                         |                  |              |
|               |                         |                      |                 |              | <i>Ngf</i>                       |                             |                 |                         |                  |              |
